# Supplementary material for: The autophagic response to polystyrene nanoparticles is mediated by transcription factor EB and depends on surface charge
Source: PubMed Central journal article supplement (PMC4657241; doi:10.1186/s12951-015-0149-6), 2015-11-23
Supplement: 12951_2015_149_MOESM2_ESM.pdf [file 12951_2015_149_MOESM2_ESM.pdf]

**Polystyrene nanoparticle purchasing information**

| <b>Name</b>          | <b>Functional Group</b> | <b>Size (nm)</b> | <b>Manufacturer</b> | <b>Cat. No.</b> |
|----------------------|-------------------------|------------------|---------------------|-----------------|
| PS                   | --                      | 50               | Magsphere           | PS050NM         |
| PS*                  | --                      | 50               | Magsphere           | PSF-050NM       |
| PS-COOH              | -COOH                   | 50               | Phosphorex          | 103             |
| PS-COOH*             | -COOH                   | 50               | Magsphere           | CAF-050NM       |
| PS-NH <sub>2</sub>   | -NH <sub>2</sub>        | 50               | Magsphere           | AM050NM         |
| PS-NH <sub>2</sub> * | -NH <sub>2</sub>        | 50               | Magsphere           | AMF-050NM       |

\*Fluorescently (FITC) labeled nanoparticles
